# Supplementary material for: Mimosa: Mixture model of co-expression to detect modulators of regulatory interaction
Source: Springer Nature journal article supplement (doi:10.1186/1748-7188-5-4), 2010-01-04

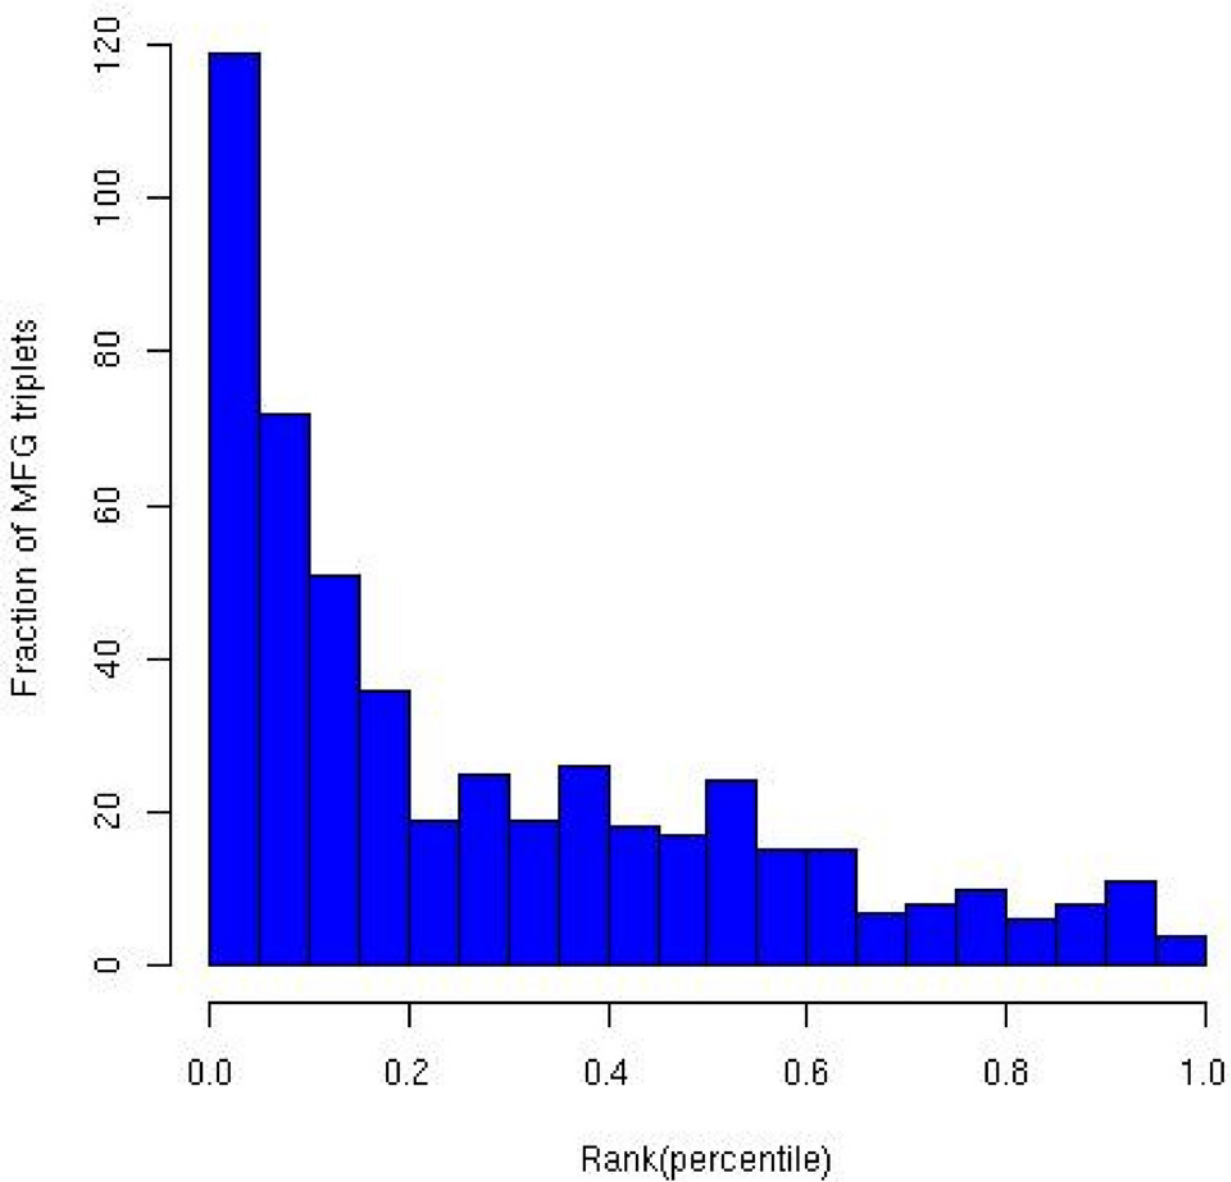

Supplement: 13015_2009_77_MOESM2_ESM.pdf [file 13015_2009_77_MOESM2_ESM.pdf]
