# Supplementary material for: Mimosa: Mixture model of co-expression to detect modulators of regulatory interaction
Source: Springer Nature journal article supplement (doi:10.1186/1748-7188-5-4), 2010-01-04

Frequency

— within TF q-vector correlation  
- - - random q-vector correlation

-1 -0.75 -0.5 -0.25 0 0.25 0.5 0  
Kendall's  $\tau$

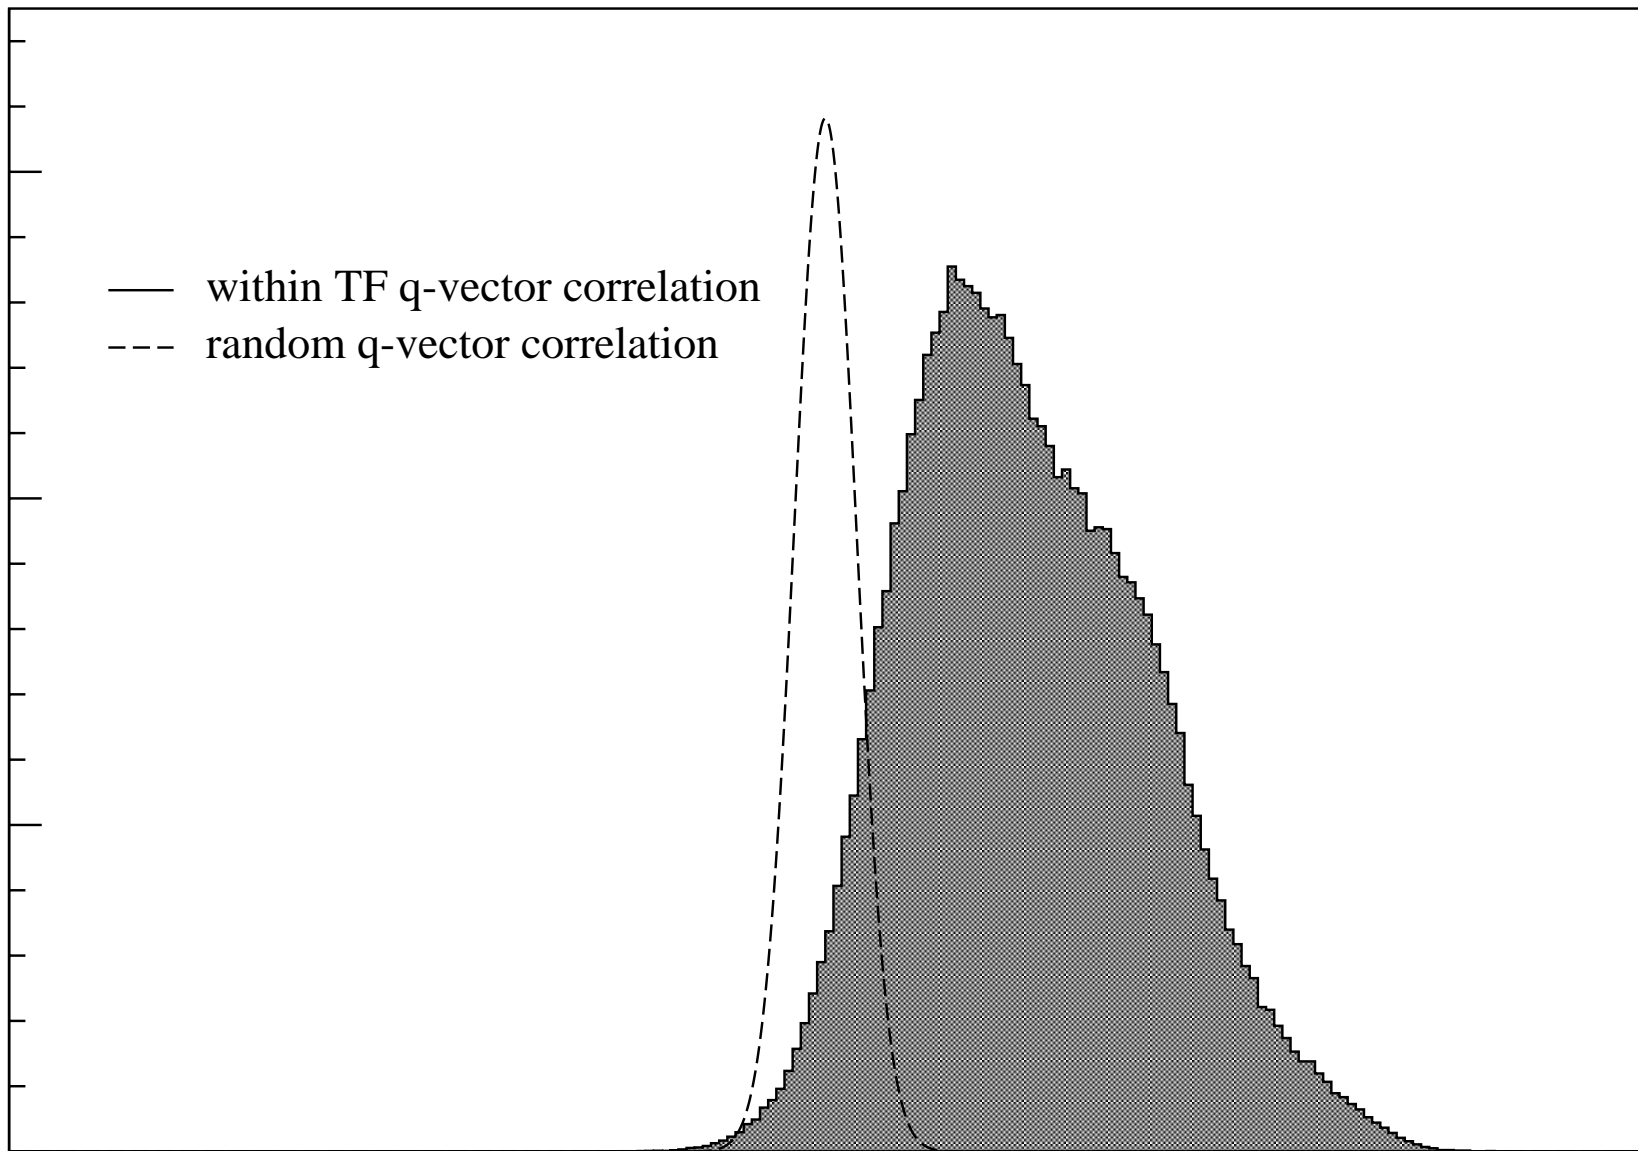

Supplement: 13015_2009_77_MOESM3_ESM.pdf [file 13015_2009_77_MOESM3_ESM.pdf]
